# Supplementary material for: Long non-coding RNA HOTTIP promotes renal cell carcinoma progression through the regulation of the miR-506 pathway
Source: publisher site journal article supplement (doi:10.18632/aging.205947), 2024-06-19
Supplement: Supplementary file [file aging-v16-205947-supplementary-material-SD1.pdf]

## SUPPLEMENTARY FIGURE

**A**

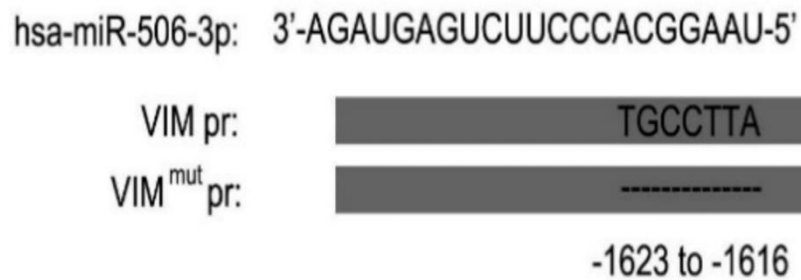

**B**

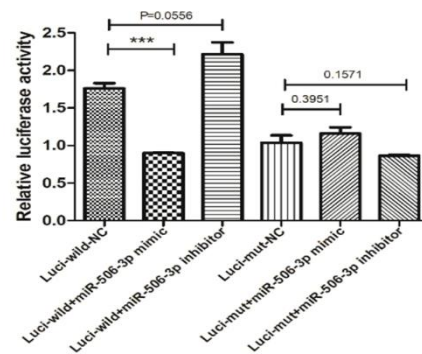

**Supplementary Figure 1.** (A) There is a binding site for mir-506 at 1623 upstream of the transcription start site (TSS) in VIM. (B) Dual-luciferase reporter gene assay was used to detect the change in luciferase activity in the mir-506 mimics and mir-506 inhibitors groups.
